# Supplementary material for: Gallium nitride nanowire as a linker of molybdenum sulfides and silicon for photoelectrocatalytic water splitting
Source: PubMed Central journal article supplement (PMC6155116; doi:10.1038/s41467-018-06140-1), 2018-09-21
Supplement: 41467_2018_6140_MOESM1_ESM.pdf [file 41467_2018_6140_MOESM1_ESM.pdf]

## Supplementary information

### **Gallium nitride nanowire as a linker of molybdenum sulfides and silicon for photoelectrocatalytic water splitting**

Zhou et al.

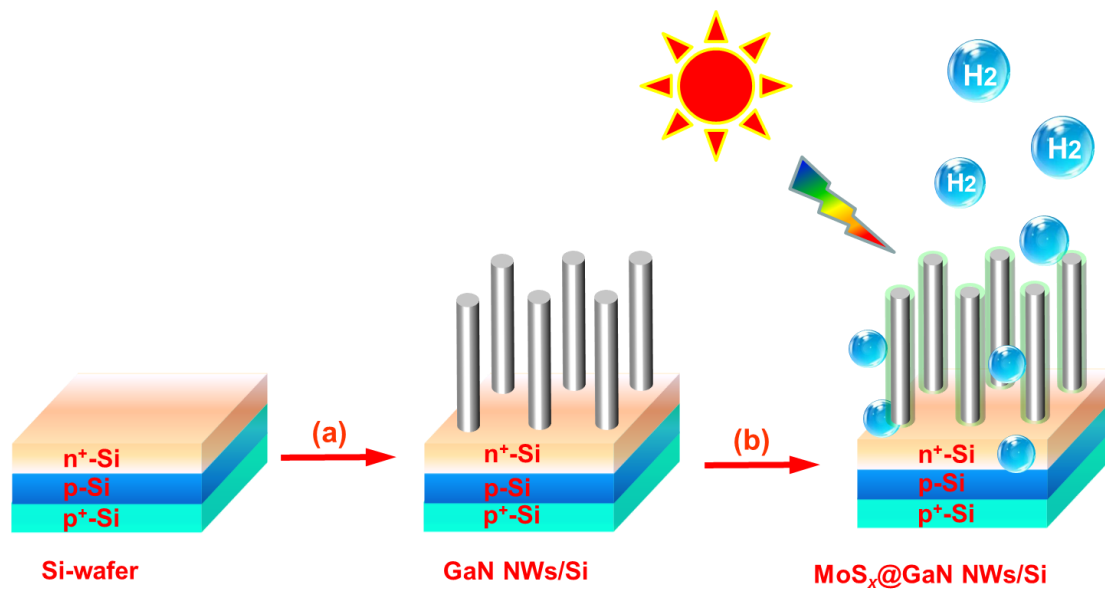

**(a): Molecular beam epitaxy; (b): Electrodeposition**

**Supplementary Figure 1** | Fabrication of shell-core  $\text{MoS}_x@ \text{GaN}$  NWs/Si by molecular beam epitaxy and electrodeposition for solar water splitting to hydrogen.

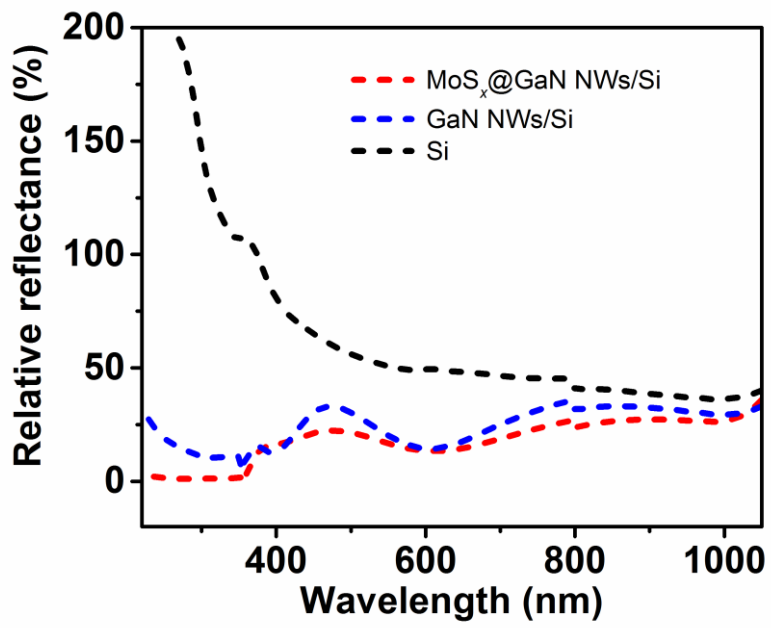

**Supplementary Figure 2** | UV-Vis relative reflectance spectra of Si, GaN NWs/Si, and MoS<sub>x</sub>@GaN NWs/Si measured under identical conditions.

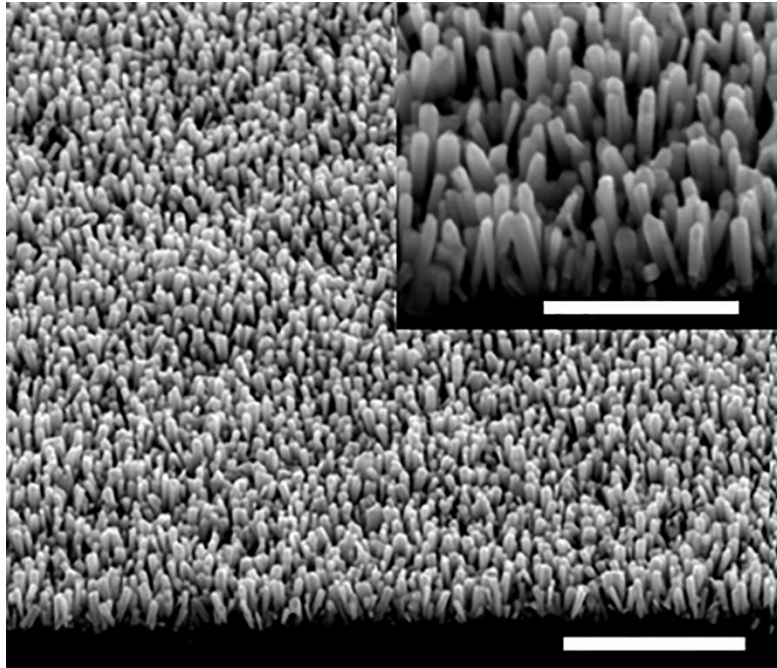

**Supplementary Figure 3** | SEM image of GaN NWs/Si in the absence of MoS<sub>x</sub>. Scale bar: 1 μm, inset 500 nm.

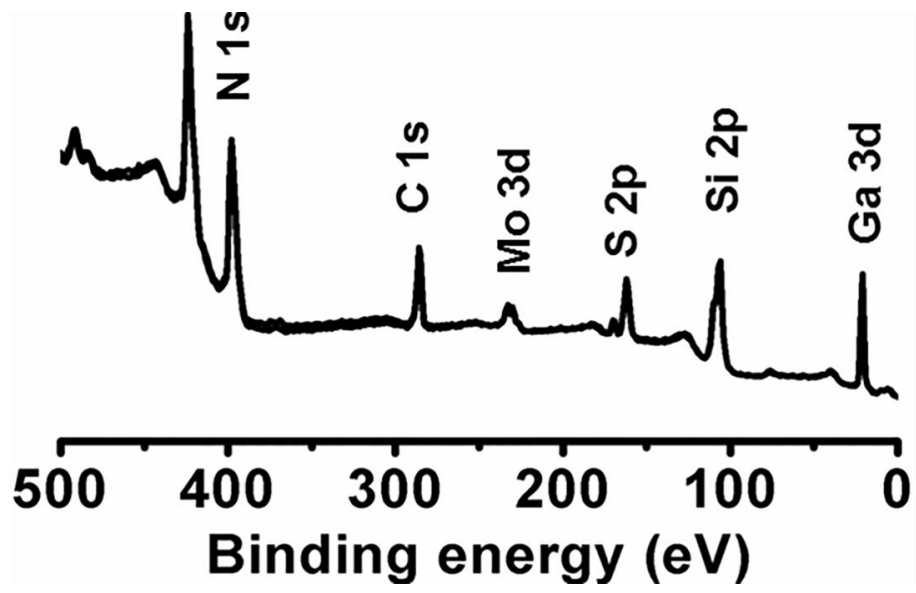

**Supplementary Figure 4** | X-ray photoelectron spectrum of MoS<sub>x</sub>@GaN NWs/Si.

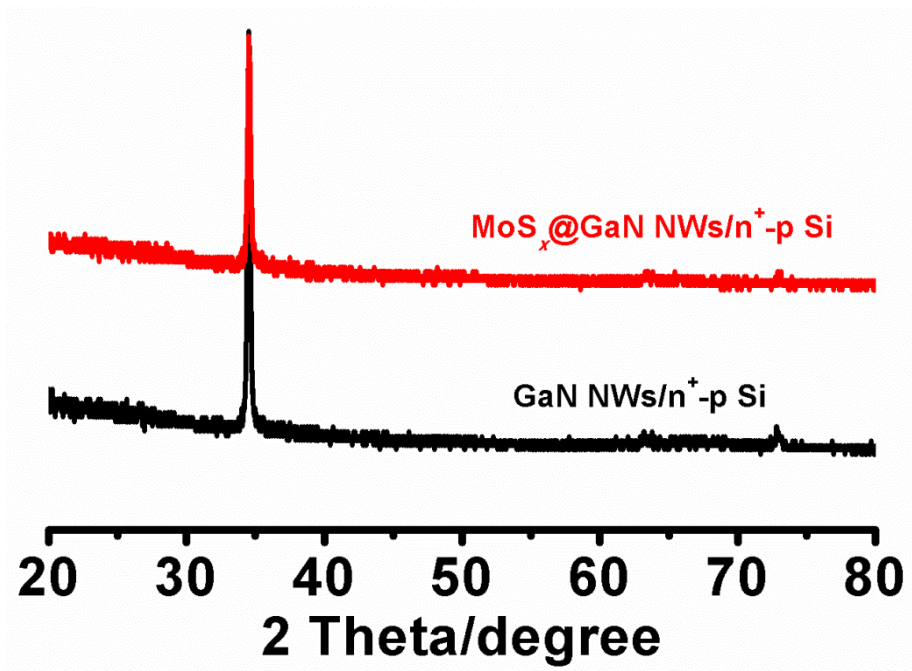

Supplementary Figure 5 | X-ray diffraction spectral of GaN NWs/Si and MoS<sub>x</sub>@GaN NWs/Si.

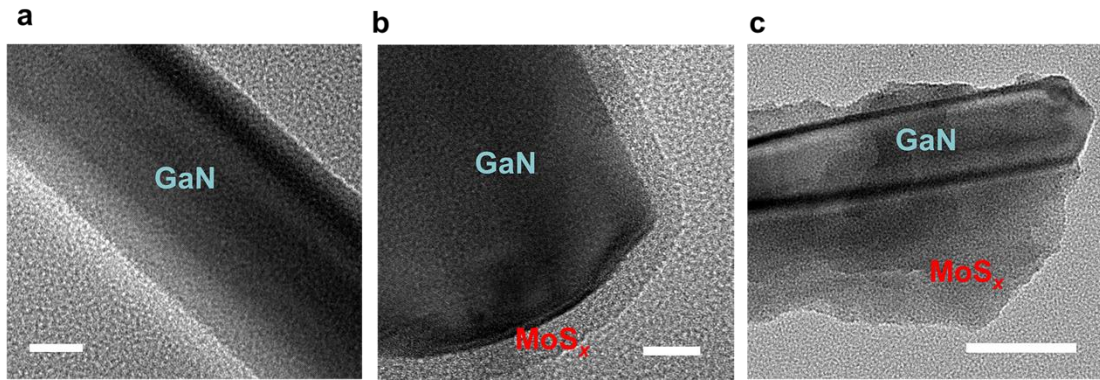

**Supplementary Figure 6** | TEM images of GaN NWs/Si deposited with various densities of MoS<sub>x</sub>.

**a**  $0 \mu\text{mol cm}^{-2}$ , **b**  $0.73 \mu\text{mol cm}^{-2}$ , and **c**  $1.72 \mu\text{mol cm}^{-2}$ . Scale bars: **a-b** 10 nm and **c** 50 nm

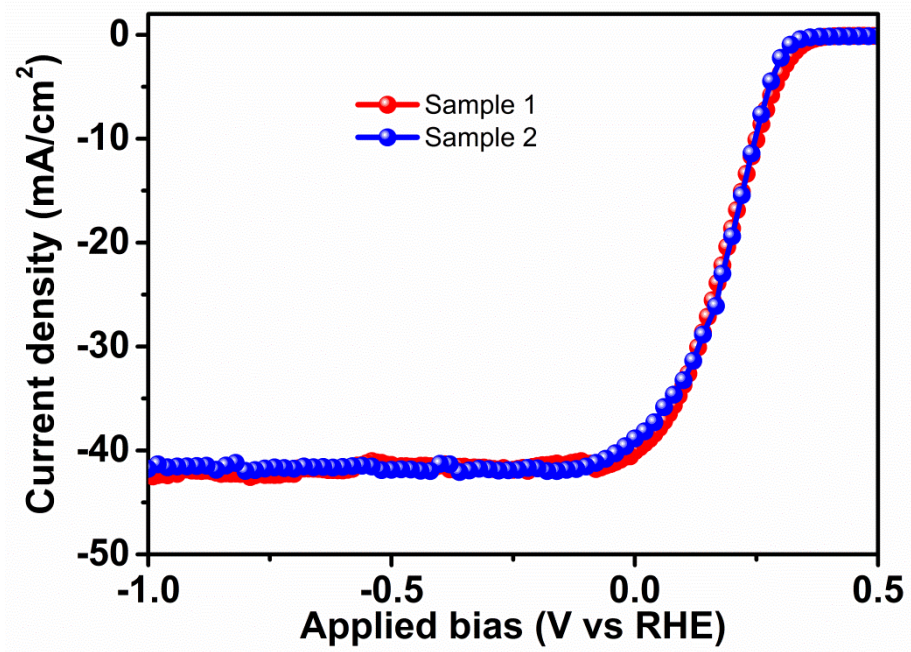

**Supplementary Figure 7** | The variation of PEC performance of MoS<sub>x</sub>@GaN NWs/Si with 0.73  $\mu\text{mol cm}^{-2}$  of MoS<sub>x</sub> under standard one-sun illumination in 0.5 M H<sub>2</sub>SO<sub>4</sub>.



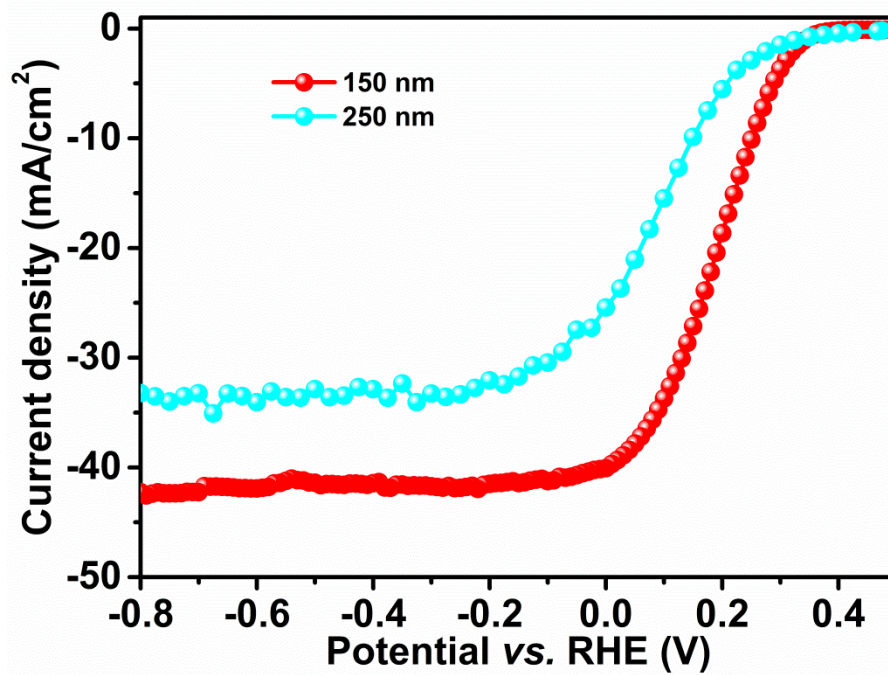

**Supplementary Figure 8** | PEC performance of MoS<sub>x</sub>@GaN NWs/Si with different lengths of GaN NWs.

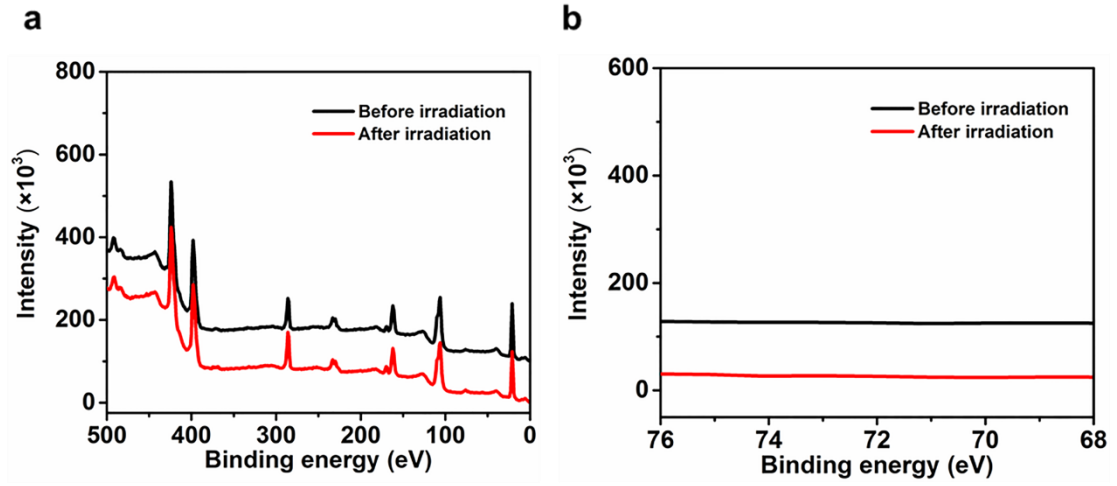

**Supplementary Figure 9** | X-ray photoelectron spectrum. **a** MoS<sub>x</sub>@GaN NWs/Si and **b** the core level spectra of Pt 4f before and after 10 hours reaction under standard one-sun irradiation in 0.5 mol L<sup>-1</sup> H<sub>2</sub>SO<sub>4</sub> aqueous solution.

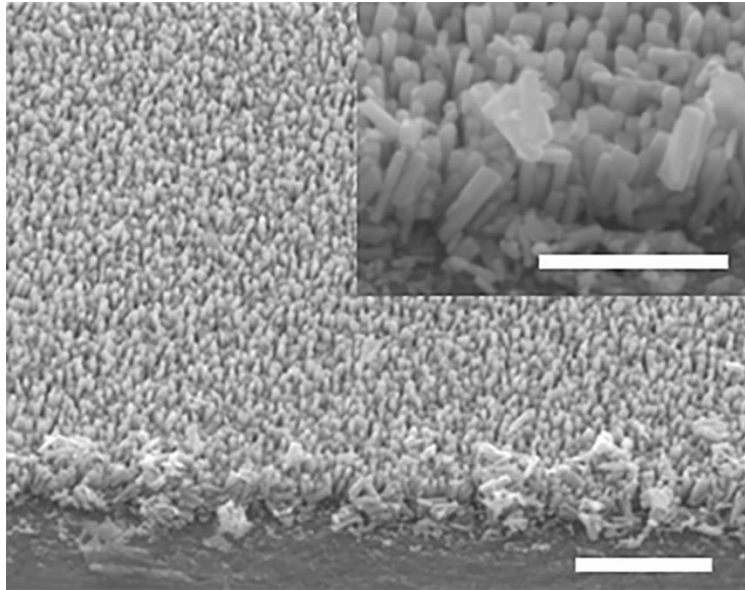

**Supplementary Figure 10** | SEM image of MoS<sub>x</sub>@GaN NWs/Si after 10 hours reaction under standard one-sun irradiation in 0.5 mol L<sup>-1</sup> H<sub>2</sub>SO<sub>4</sub> aqueous solution. Scale bar: 2 μm, inset 500 nm.

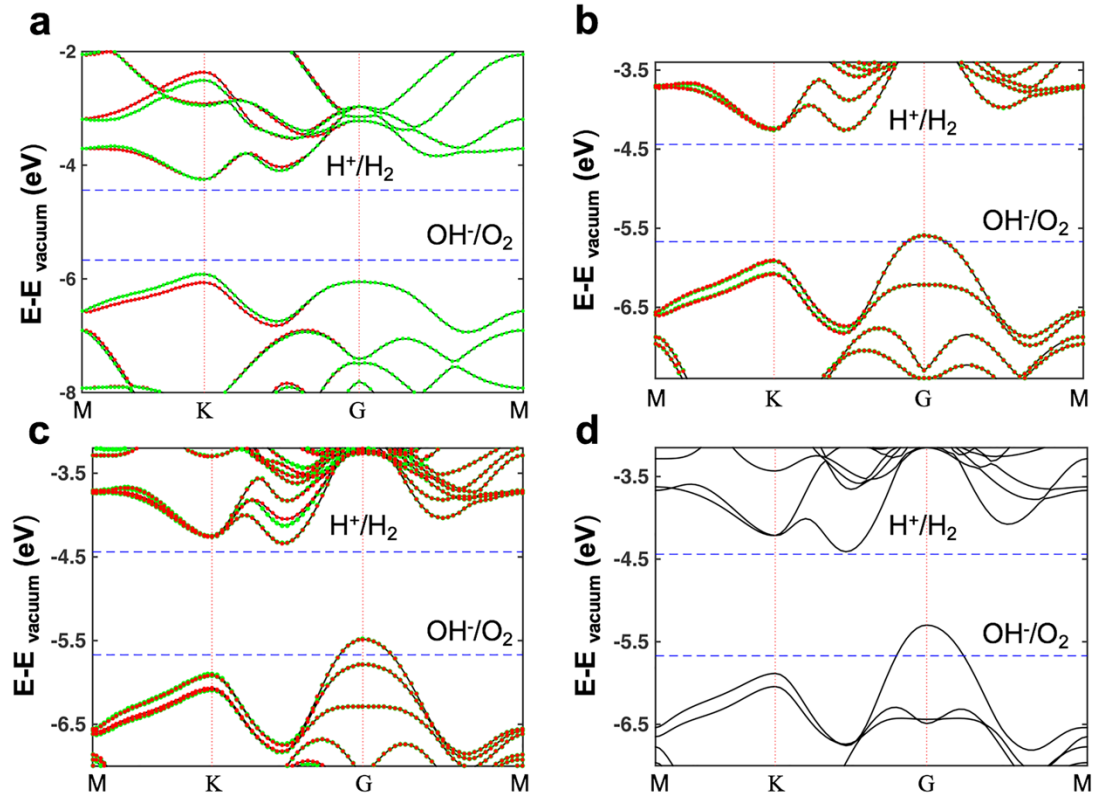

**Supplementary Figure 11** | Band structure of MoS<sub>2</sub> with different thicknesses. **a** MoS<sub>2</sub>-1L, **b** MoS<sub>2</sub>-2L, **c** MoS<sub>2</sub>-3L, **d** MoS<sub>2</sub>-bulk. Spin-orbital coupling is taken into consideration for band structure calculations of few-layer MoS<sub>2</sub>. In even-layer and bulk MoS<sub>2</sub>, their inversion symmetry combined with time reversal leads to Kramers degeneracy, which means that no spin splitting exists. Oxidation-Reduction-Potential (ORP) is marked as OH/O<sub>2</sub> and H<sup>+</sup>/H<sub>2</sub> with blue dashed line. This figure shows that regardless of the thickness of MoS<sub>2</sub>, its conduction band minimum (CBM) remains at an optimal position referring to the reduction potential of H<sub>2</sub>O splitting.

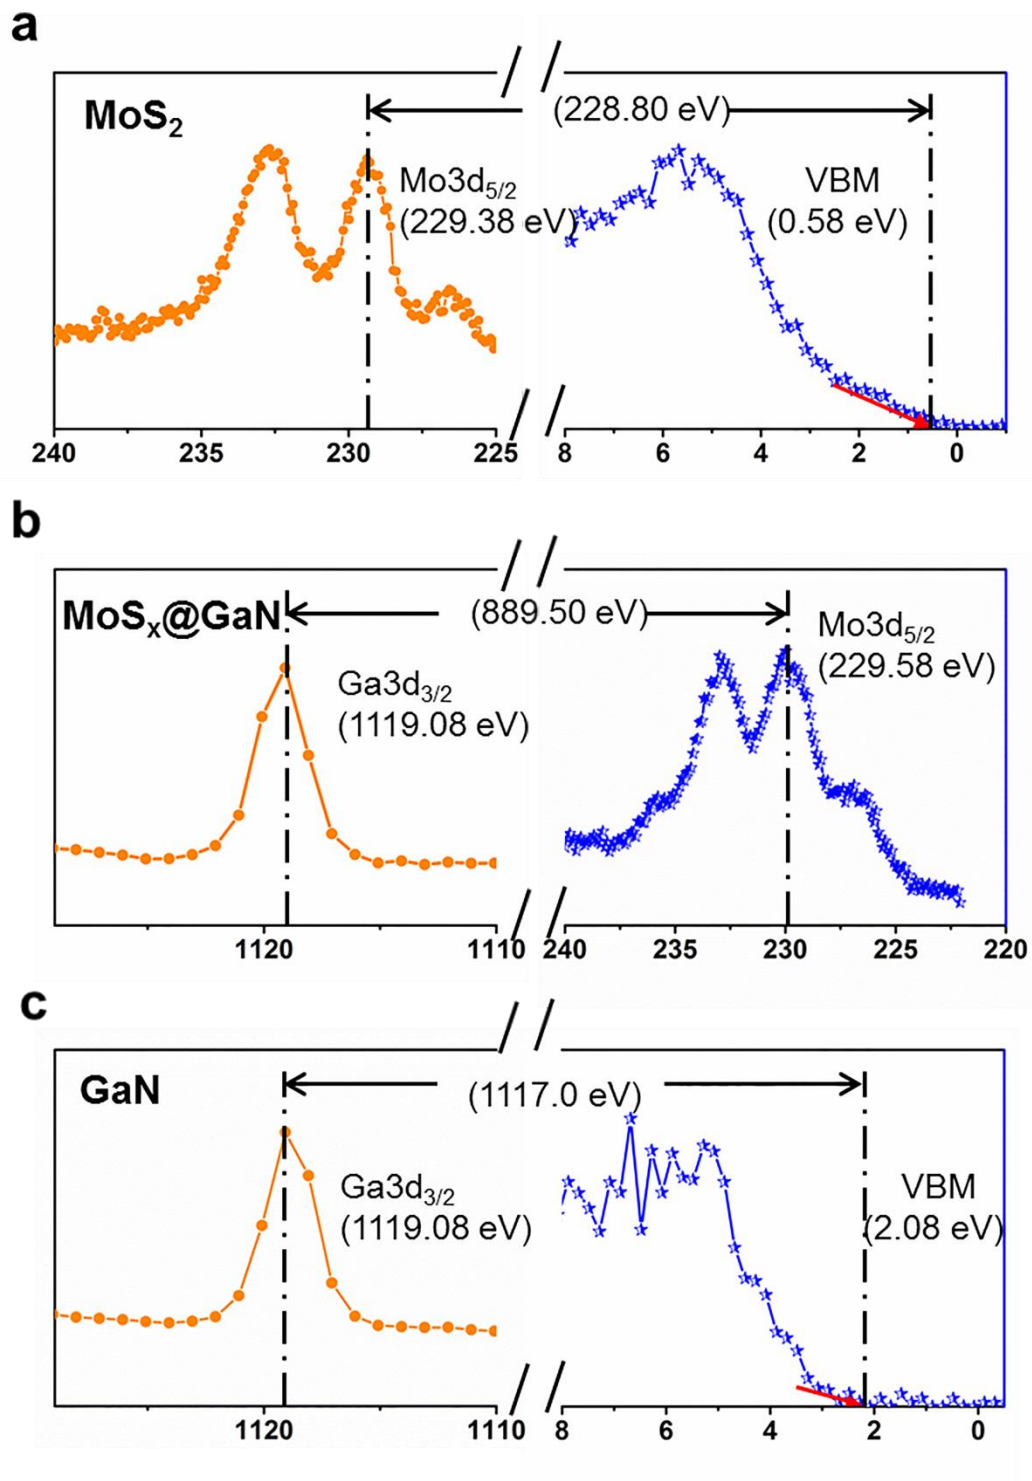

**Supplementary Figure 12** | Core-level and valence band spectra based on XPS measurement. **a** MoS<sub>2</sub>, **b** MoS<sub>x</sub>@GaN, and **c** GaN.

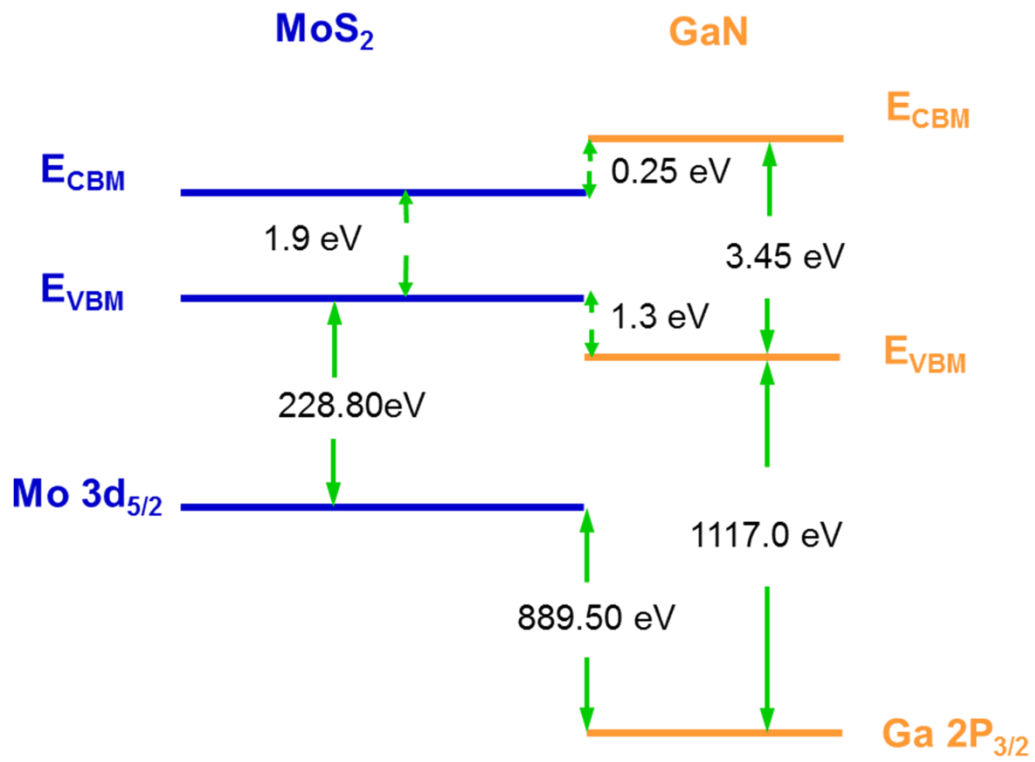

**Supplementary Figure 13** | The flat band alignment diagram of MoS<sub>x</sub>@GaN based on XPS measurement.

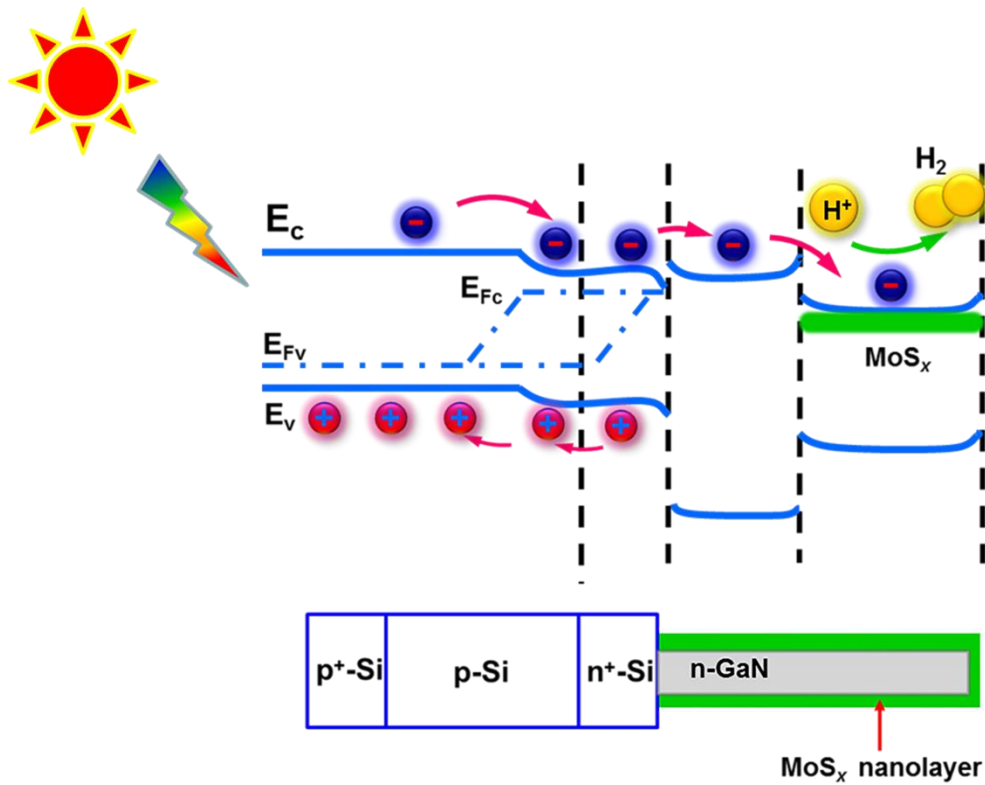

**Supplementary Figure 14** | Energy band diagram of MoS<sub>x</sub>@GaN NWs/Si under illumination. Herein, both Si and GaN are heavily n-type doped, which can facilitate the electrons transfer from Si to GaN. Moreover, under irradiation, the abundant photogenerated electrons result in flat-band condition, which decreases the upward bending of surface energy and promotes the electron injection from n<sup>+</sup>-Si player to n-GaN at a small applied bias. The unique electronic interaction and outstanding geometric-matching structure between GaN and MoS<sub>2</sub> further provides an ideal electron-migration channel for the electrons transfer to HER catalytic sites.

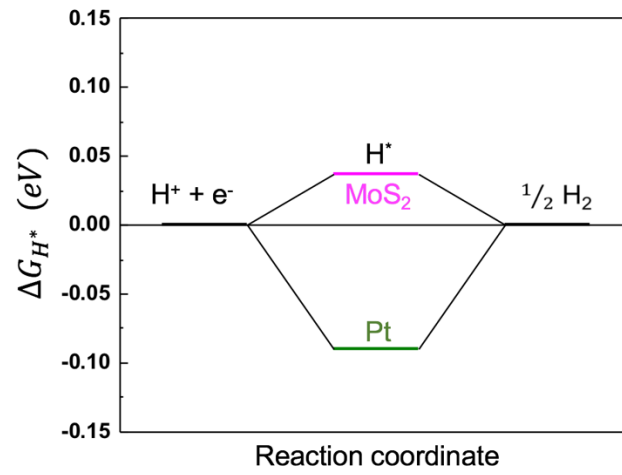

**Supplementary Figure 15** | Free energy diagram of MoS<sub>2</sub> for HER at equilibrium (U=0) relative to SHE at pH = 0.



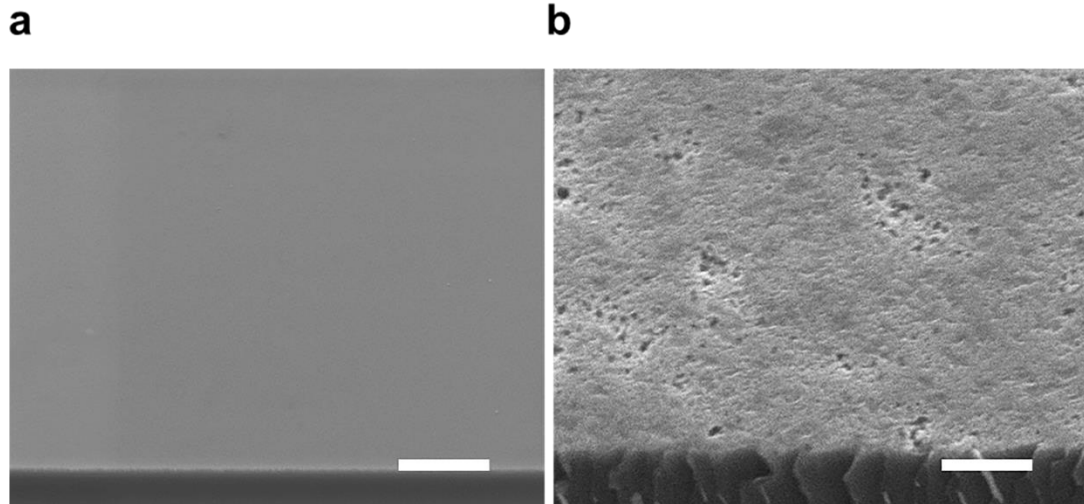

**Supplementary Figure 16** | 45°- titled SEM images. **a** bare planar n<sup>+</sup>-p junction Si and **b** MoS<sub>x</sub>/Si.

Scale bar: 1 μm.
